# Supplementary material for: A series of luminescent Cu(i) complexes based on the diphosphine ligand and diimine ligand: weak intermolecular interactions, terahertz spectroscopy and photoproperties
Source: Royal Society of Chemistry journal article supplement (doi:10.1039/d1ce01132d), 2021-01-01
Supplement: d1ce01132d1.pdf [file d1ce01132d1.pdf]

## Supporting information

A series of luminescence Cu(I) complexes based on  
diphosphine ligand and diimine ligand tuning by counter  
anions: the weak intermolecular interactions, terahertz  
spectra and photoproperties

Zi-Xi Li,<sup>†a</sup> Xiao-Nan Kuang,<sup>†a</sup> Guo Wang,<sup>a</sup> Ning Zhu,<sup>a</sup> Zhen-Zhou Sun,<sup>a</sup> Hong-Liang Han,<sup>a</sup> Yu-Ping Yang,<sup>b</sup> Zhong-Feng Li,<sup>a</sup> Xiu-Lan Xin,<sup>c</sup> Qiong-Hua Jin<sup>\*a,d</sup>, Zhi-Gang Ren<sup>\*e</sup>

<sup>a</sup>Department of Chemistry, Capital Normal University, Beijing 100048, China. E-mail: [jinqh@cnu.edu.cn](mailto:jinqh@cnu.edu.cn)

<sup>b</sup>School of Science, Minzu University of China, Beijing 100081 China.

<sup>c</sup>School of Light Industry, Beijing Technology and Business University, Beijing 100048, China.

<sup>d</sup>State Key Laboratory of Structural Chemistry, Fujian Institute of Research on the Structure of Matter, Chinese Academy of Sciences, Fuzhou, Fujian 350002, China.

<sup>e</sup>College of Chemistry, Chemical Engineering and Materials Science, Soochow University, Suzhou 215123, China.  
E-mail: [renzhiqiang@suda.edu.cn](mailto:renzhiqiang@suda.edu.cn)

<sup>†</sup>Zi-Xi Li and Xiao-Nan Kuang contributed equally to this work.

Electronic Supplementary Information (ESI) available: crystal structure information, spectra data and computation details. CCDC: 2103602, 1969929, 1969928, 2103705, 2103706.

### Caption of Figure

**Fig. S1** The IR spectra for complex 1.

**Fig. S2** The IR spectra for complex 2.

**Fig. S3** The IR spectra for complex 3.

**Fig. S4** The IR spectra for complex 4.

**Fig. S5** The IR spectra for complex 5.

**Fig. S6** The <sup>1</sup>H NMR spectra for complex 1.

**Fig. S7** The <sup>1</sup>H NMR spectra for complex 2.

**Fig. S8** The <sup>1</sup>H NMR spectra for complex 3.

**Fig. S9** The <sup>1</sup>H NMR spectra for complex 4.

**Fig. S10** The <sup>1</sup>H NMR spectra for complex 5.

**Fig. S11** The <sup>31</sup>P NMR spectra for complex 1.

**Fig. S12** The <sup>31</sup>P NMR spectra for complex 2.

**Fig. S13** The <sup>31</sup>P NMR spectra for complex 3.

**Fig. S14** The <sup>31</sup>P NMR spectra for complex 4.

**Fig. S15** The <sup>31</sup>P NMR spectra for complex 5.

**Fig. S16** The PXRD patterns for complex **1**: simulated from single crystal data (Black) and single phase polycrystalline sample (Red).

**Fig. S17** The PXRD patterns for complex **2**: simulated from single crystal data (Black) and single phase polycrystalline sample (Red).

**Fig. S18** The PXRD patterns for complex **3**: simulated from single crystal data (Black) and single phase polycrystalline sample (Red).

**Fig. S19** The PXRD patterns for complex **4**: simulated from single crystal data (Black) and single phase polycrystalline sample (Red).

**Fig. S20** The PXRD patterns for complex **5**: simulated from single crystal data (Black) and single phase polycrystalline sample (Red).

**Fig. S21** The thermal stability curves for complexes **1-5**.

**Fig. S22** Coordination environment of Cu(I) in complexes **1** (a), **2** (b), **3** (c), **4**(d), **5**(e) thermal ellipsoid drawn with a probability of 30%. For clarity, all hydrogen atoms and solvent molecules have been omitted.

**Fig. S23** Hydrogen bonds in **1** (C1-H1...O2, 2.49 Å; C11-H11...O1, 2.50 Å; C21-H21...O3, 2.34 Å; C37-H37A...O2, 2.47 Å; C47-H47...O3, 2.48 Å; C51-H51...O2, 2.44 Å; C52-H52...F3, 2.46 Å).

**Fig. S24** Hydrogen bonds in **2** (C1-H1...F4, 2.55 Å; C9-H9...F3, 2.46 Å; C10-H10...F1, 2.41 Å; C25-H25A...F4, 2.50 Å; C26-H26B...F4, 2.37 Å; C29-H29...F3, 2.39 Å).

**Fig. S25** Hydrogen bonds in **3** (C1-H1...O3, 2.36 Å; C30-H30A...O4, 2.44 Å).

**Fig. S26** Hydrogen bonds in **4** (O1-H1A...I1, 2.82 Å; C1-H1...I1, 3.06 Å)

**Fig. S27** Hydrogen bonds in **5** (O1-H1A...O2, 1.90 Å; O2-H2A...Br1, 2.48 Å; C1-H1...Br1, 2.86 Å; C12-H12...Br1, 2.85 Å; C38-H38...Br1, 2.86 Å; C51-H51...O1, 2.56 Å;).

**Fig. S28** Terahertz time-domain spectroscopy (THz-TDS) of bdpmpapy.

**Fig. S29** Terahertz time-domain spectroscopy (THz-TDS) of Bphen.

**Fig. S30** Terahertz time-domain spectroscopy (THz-TDS) of complexes 1-5.

## Caption of Table

**Table. S1** Selected bond lengths (Å) and angles (°) for complexes **1-5**.

**Table. S2** Intermolecular C-H... $\pi$  interactions for complex **1**.

**Table. S3** Intermolecular C-H... $\pi$  interactions for complex **2**.

**Table. S4** Intermolecular C-H... $\pi$  interactions for complex **3**.

**Table. S5** Intermolecular C-H... $\pi$  interactions for complex **4**.

**Table. S6** Intermolecular C-H... $\pi$  interactions for complex **5**.

**Table. S7** Intermolecular  $\pi$ ... $\pi$  interactions for complex **2**.

**Table. S8** Intermolecular  $\pi$ ... $\pi$  interactions for complex **3**.

**Table. S9** Fluorescence data for ligands Bphen and bdpmpapy.

**Table. S10** Energy, oscillator strength and major contribution of the calculated transitions for complex **3**.

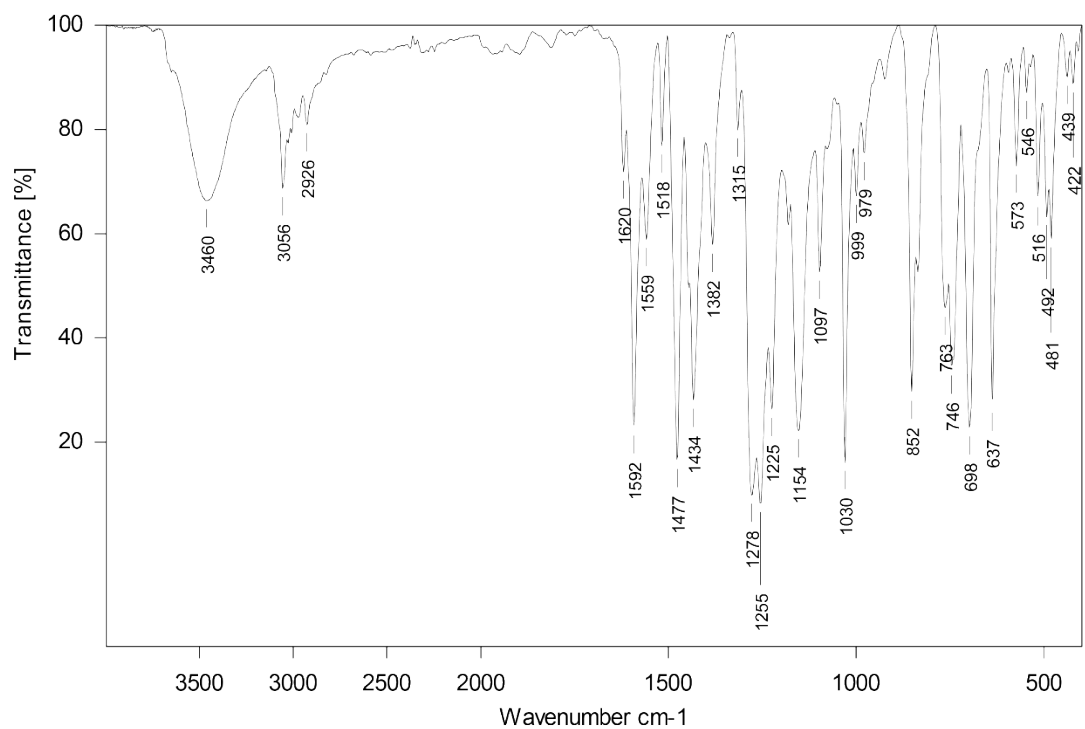

**Fig. S1** The IR spectra for complex 1.

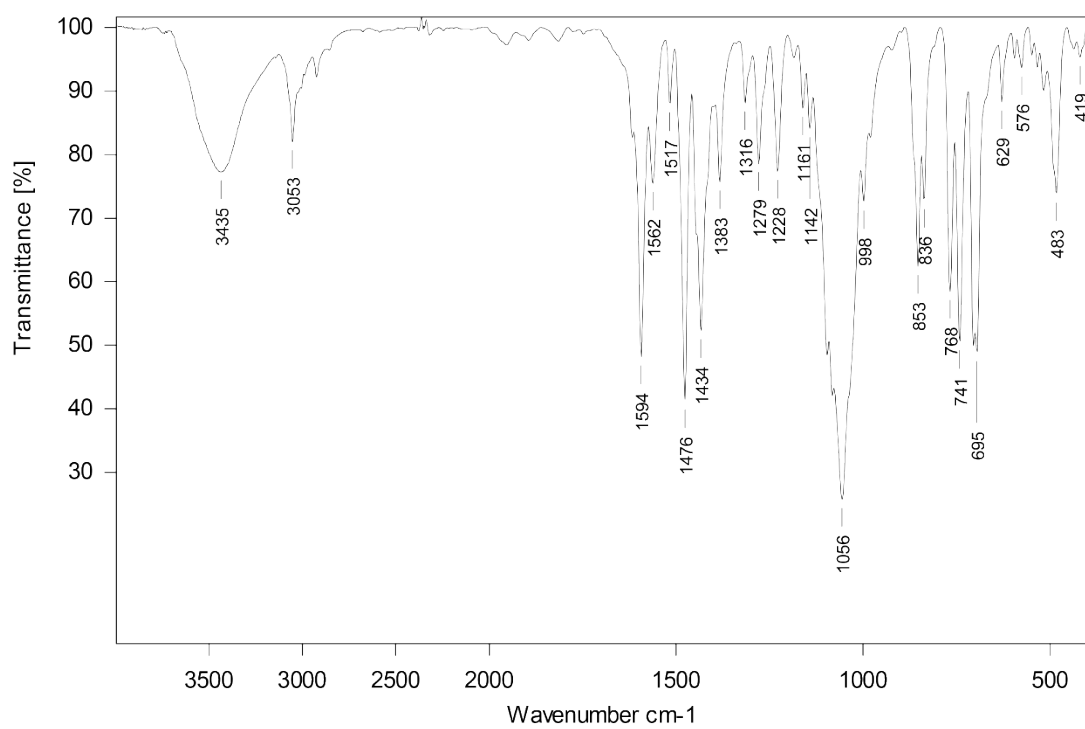

**Fig. S2** The IR spectra for complex 2.

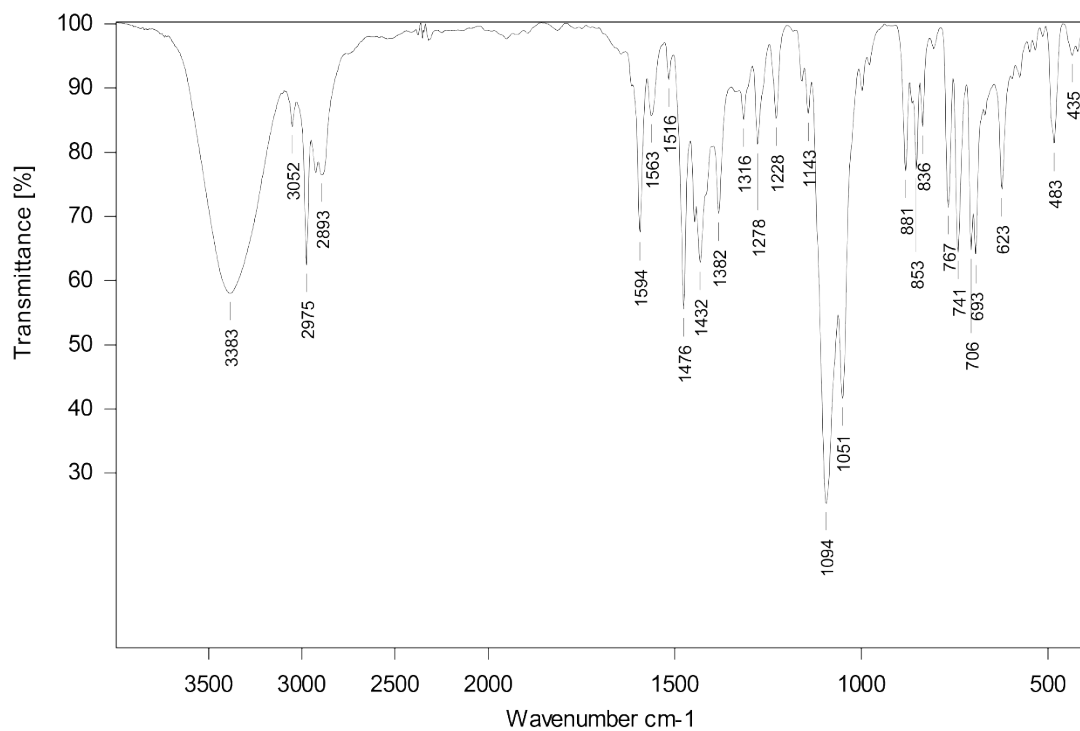

**Fig. S3** The IR spectra for complex 3.

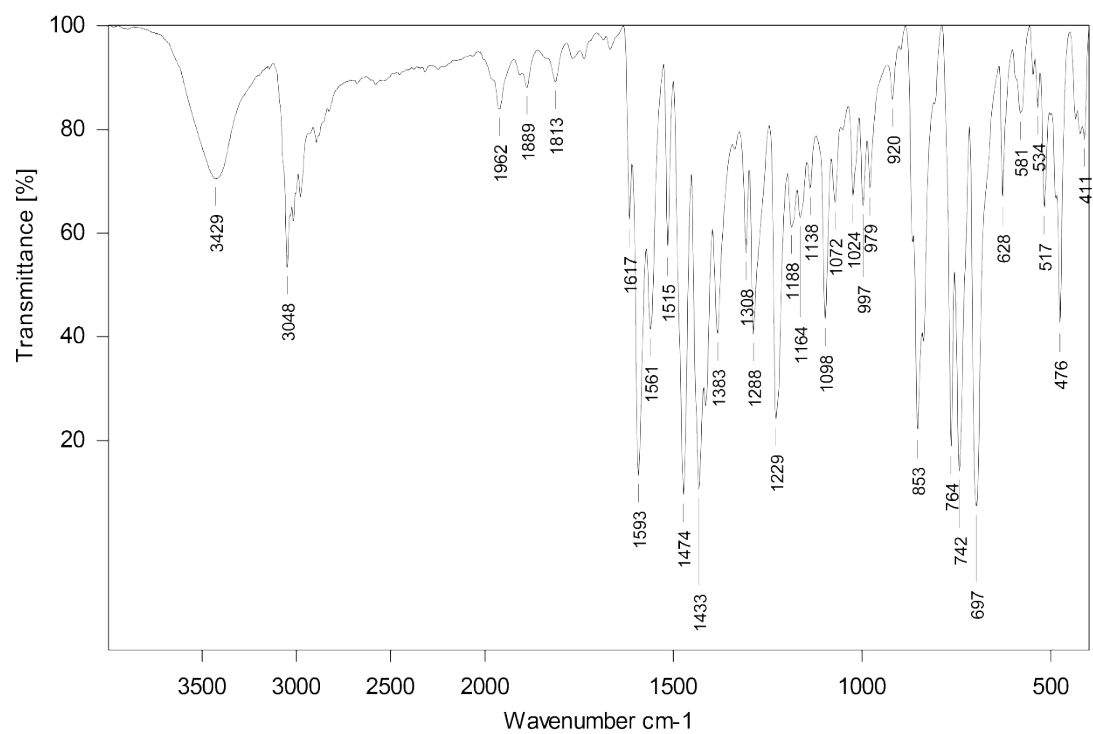

**Fig. S4** The IR spectra for complex 4.







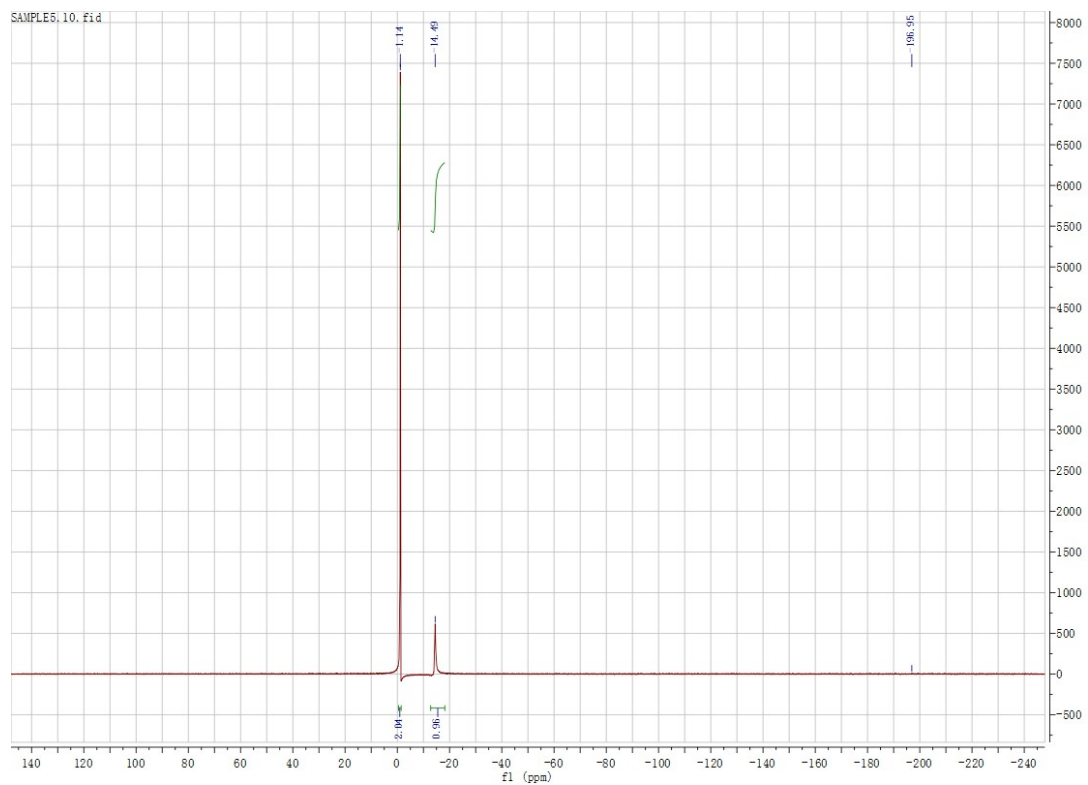

Fig. S11 The  $^{31}\text{P}$  NMR spectra for complex 1.

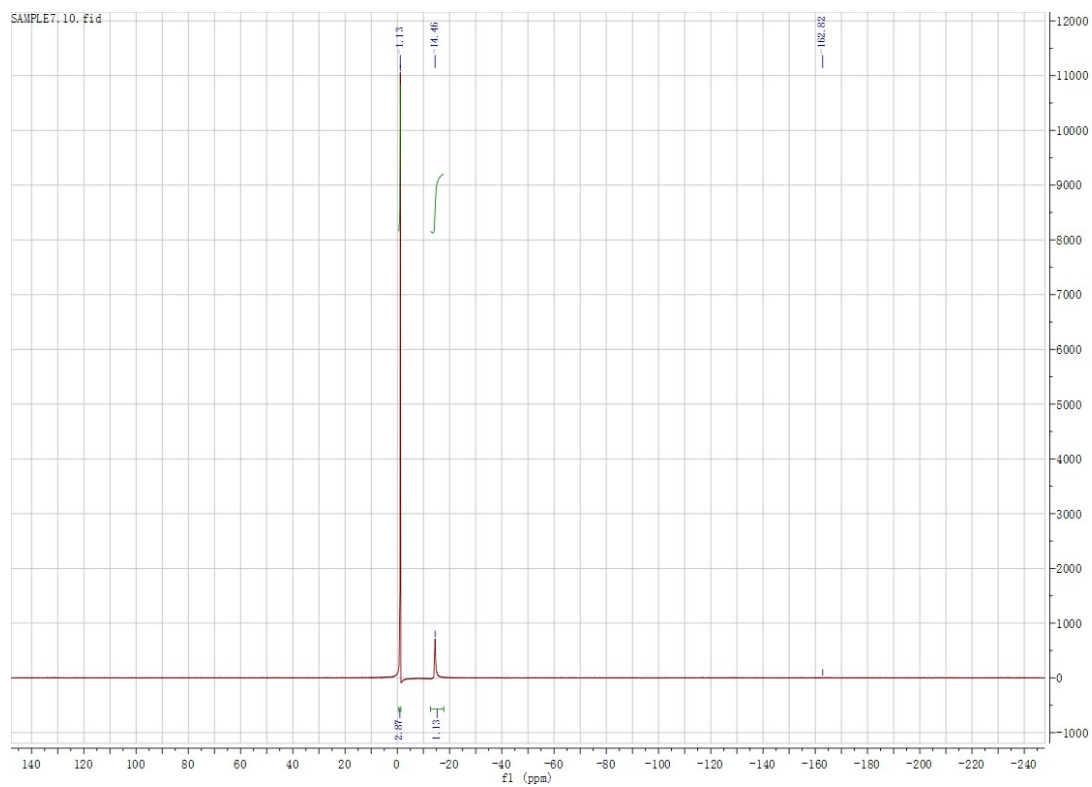

Fig. S12 The  $^{31}\text{P}$  NMR spectra for complex 2.



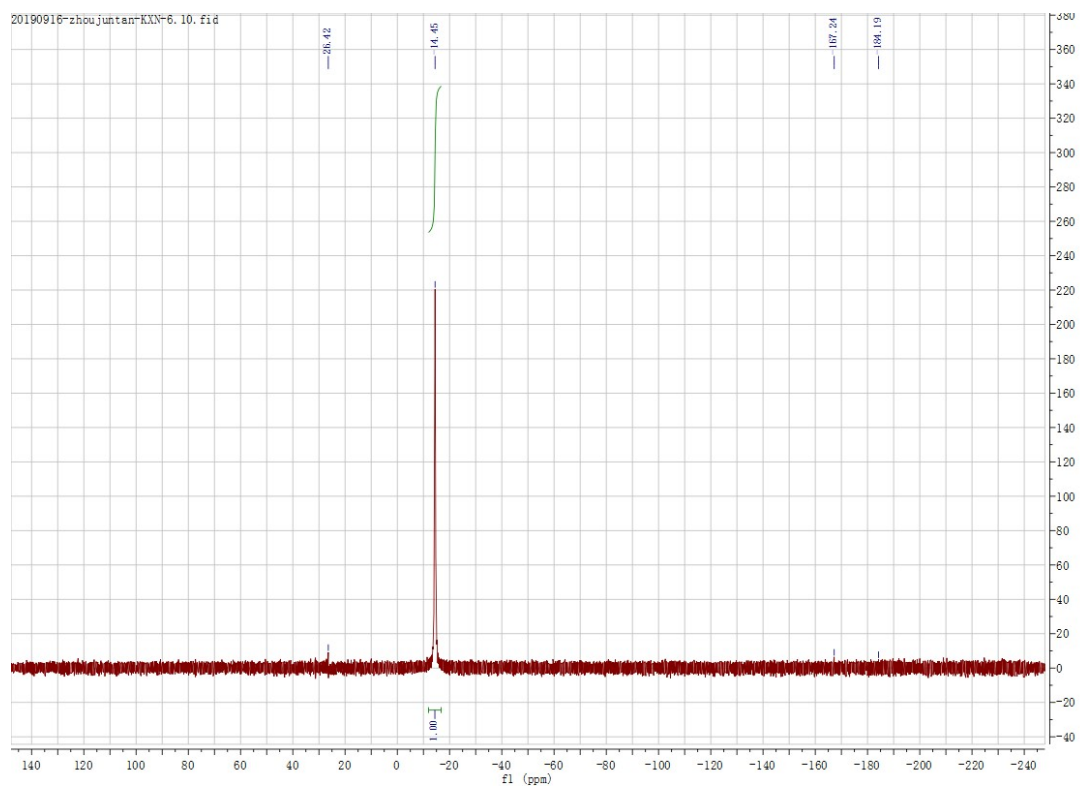

Fig. S13 The  $^{31}\text{P}$  NMR spectra for complex 3.

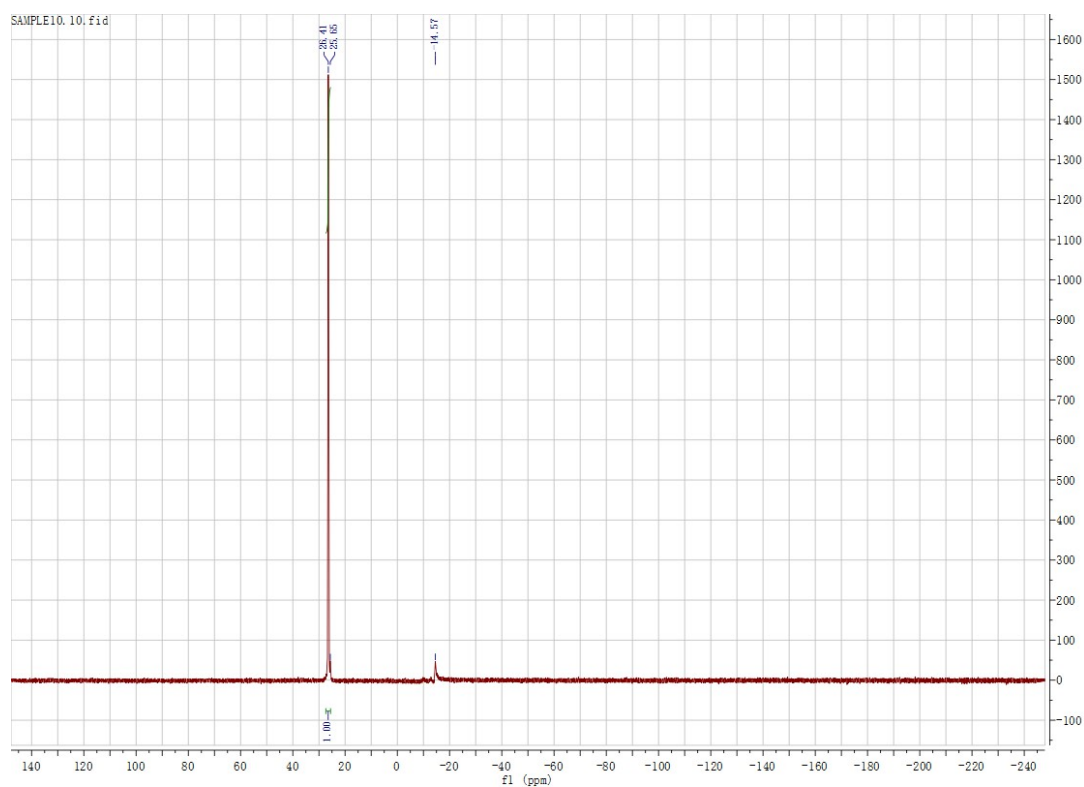

Fig. S14 The  $^{31}\text{P}$  NMR spectra for complex 4.

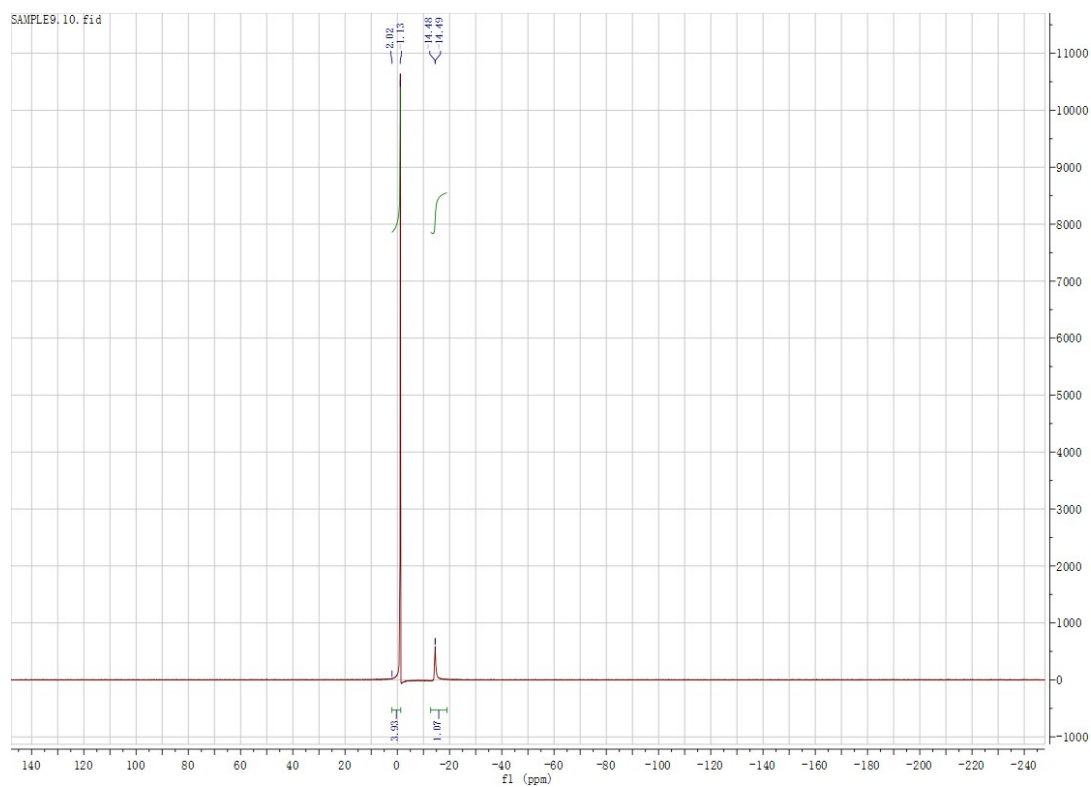

**Fig. S15** The  $^{31}\text{P}$  NMR spectra for complex **5**.

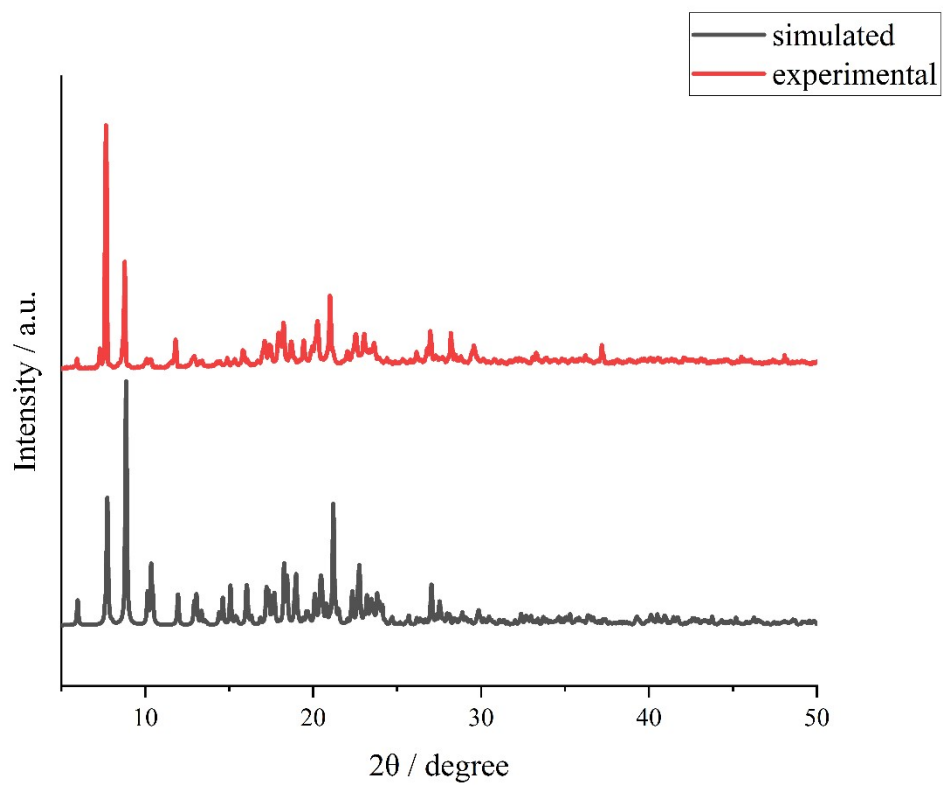

**Fig. S16** The PXRD patterns for complex **1**: simulated from single crystal data (Black) and single phase polycrystalline sample (Red).

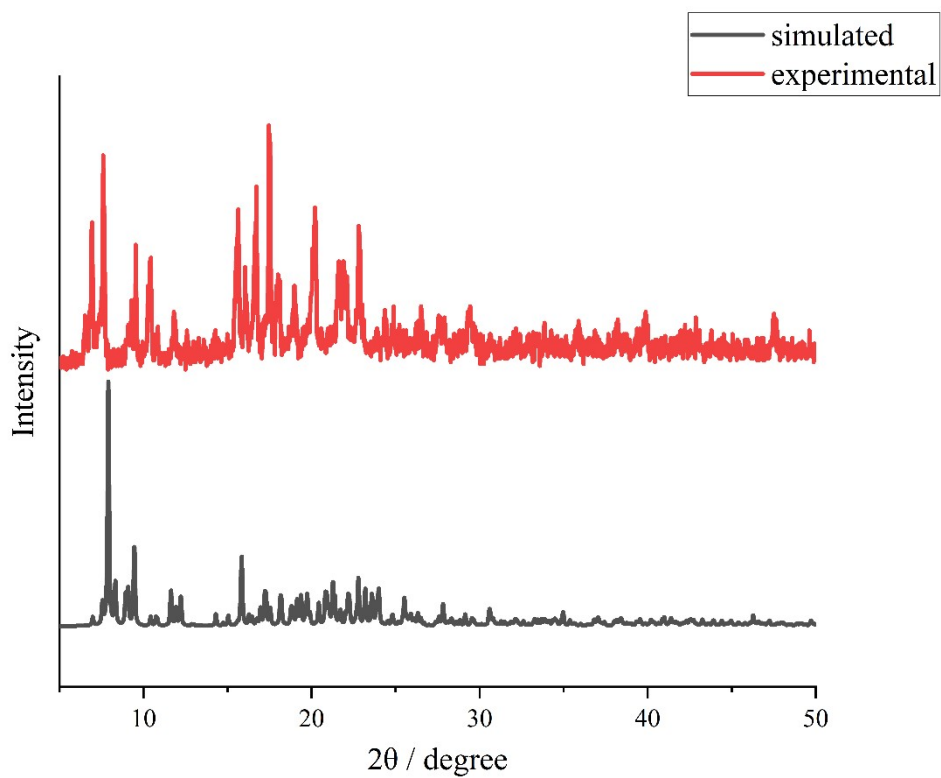

**Fig. S17** The PXRD patterns for complex **2**: simulated from single crystal data (Black) and single phase polycrystalline sample (Red).

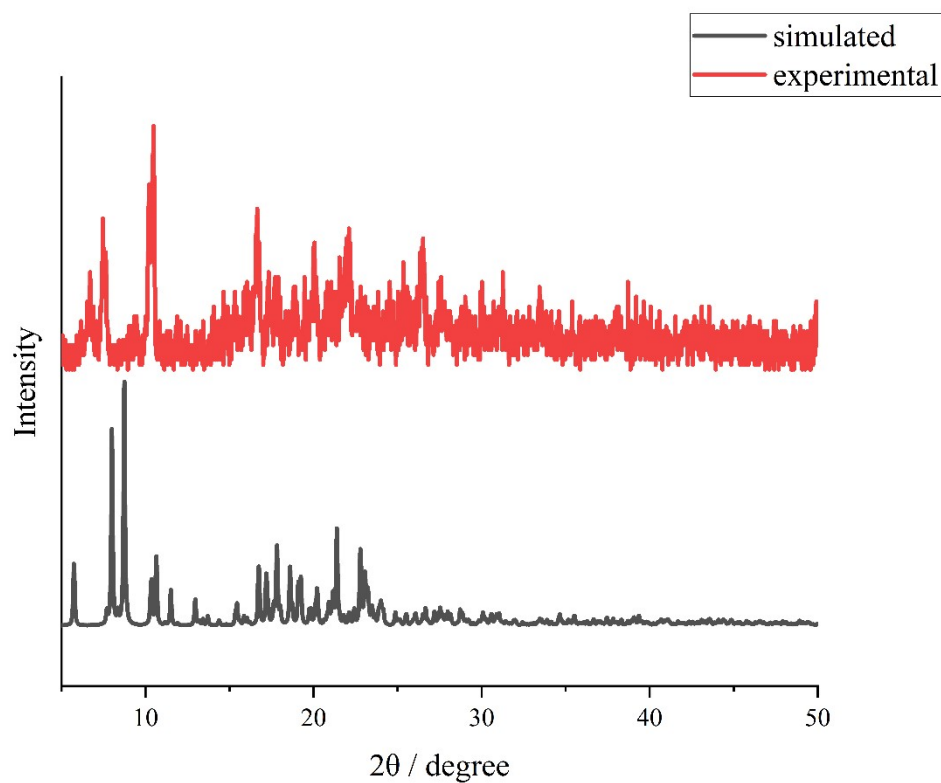

**Fig. S18** The PXRD patterns for complex **3**: simulated from single crystal data (Black) and single phase polycrystalline sample (Red).

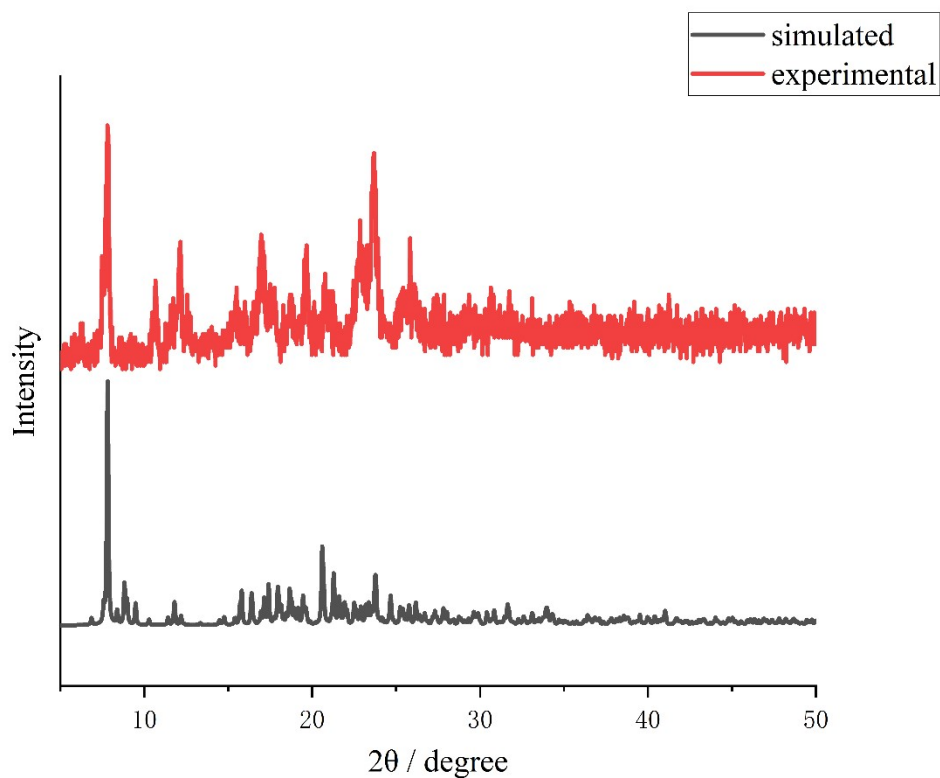

**Fig. S19** The PXRD patterns for complex 4: simulated from single crystal data (Black) and single phase polycrystalline sample (Red).

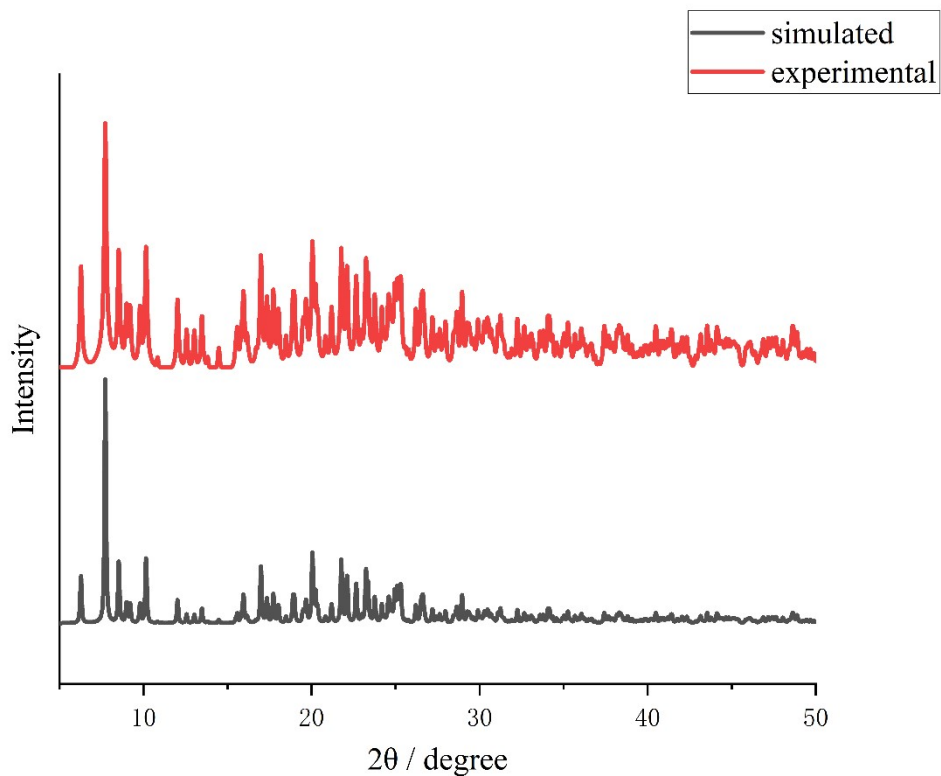

**Fig. S20** The PXRD patterns for complex 5: simulated from single crystal data (Black) and single phase polycrystalline sample (Red).

TGA was used to verify the stability of complexes **1-5** and the number of solvent molecules in the complexes (Fig. S21). As shown in graph, all the complexes presented weight loss related to the decomposition of ligands bdpmpay and Bphen. The TGA curves of complexes **2**, **4** and **5** all showed weight loss connected with the solvent molecules in their crystal structures (**2**: 99.16% at 165 °C, caclcd: 99.13%; **4**: 97.00% at 273 °C, caclcd: 96.94%; **5**: 93.81% at 260 °C, caclcd: 93.79%).

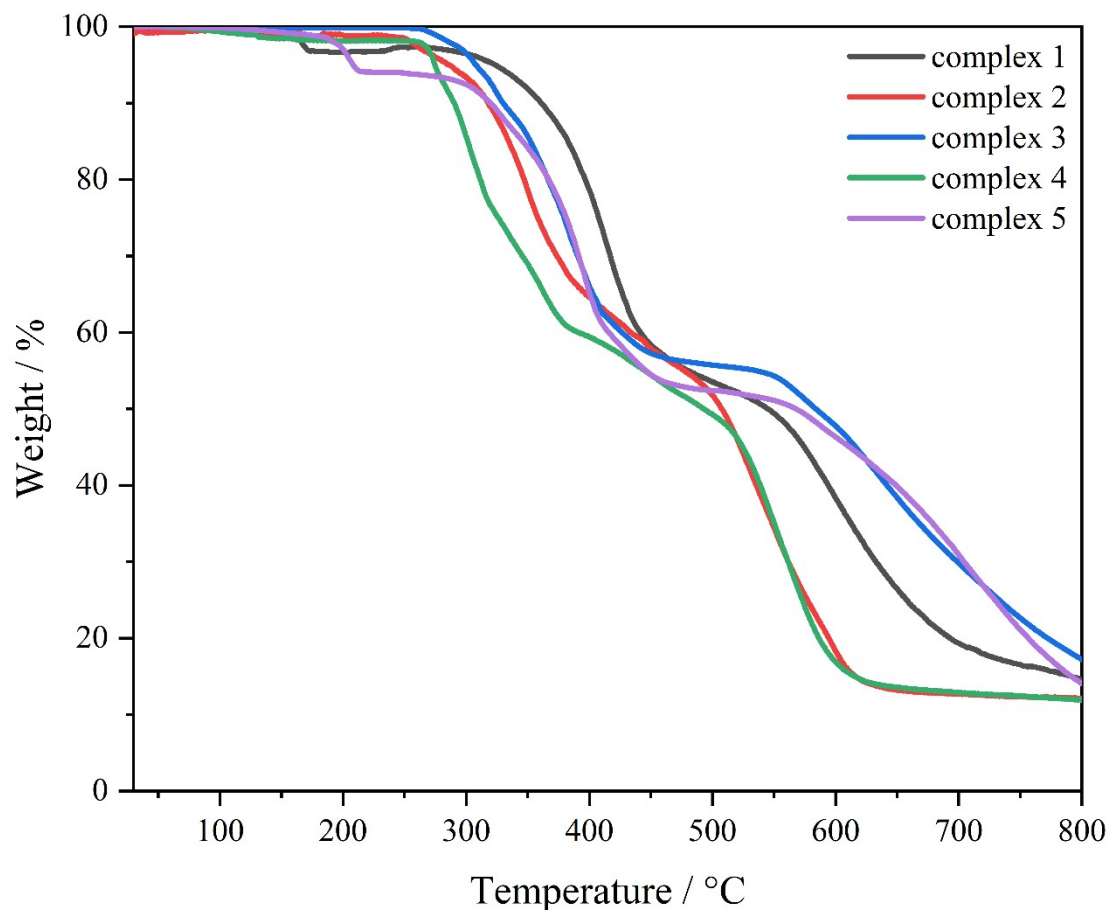

**Fig. S21** The thermal stability curves for complexes **1-5**.

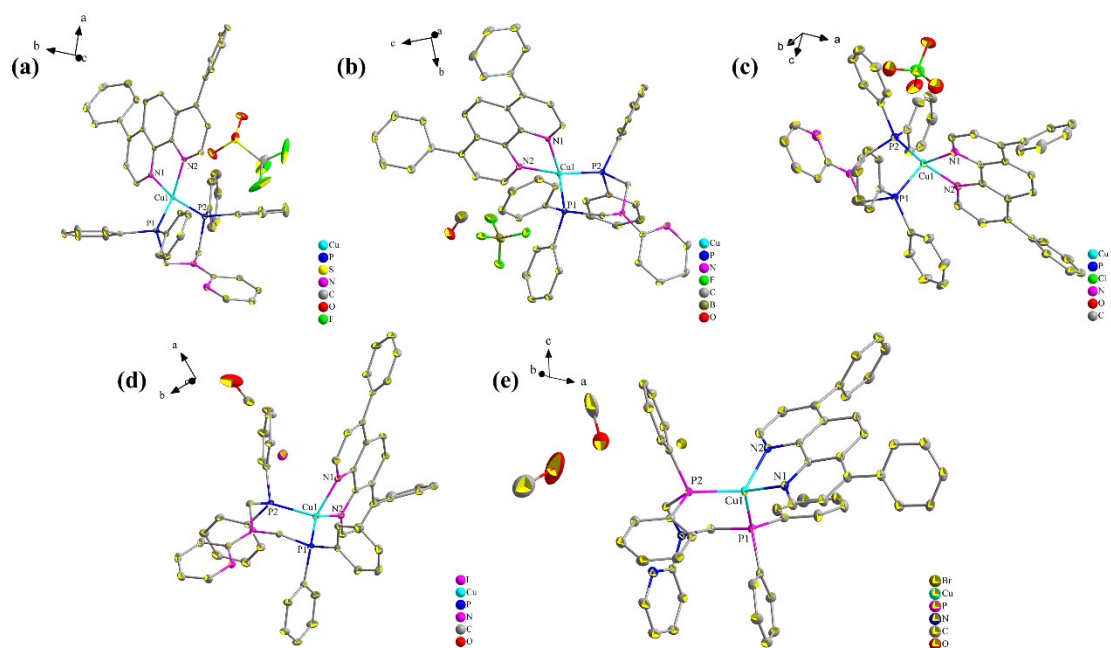

**Fig. S22** Coordination environment of Cu(I) in complexes **1** (a), **2** (b), **3** (c), **4**(d), **5**(e) thermal ellipsoid drawn with a probability of 30%. For clarity, all hydrogen atoms and solvent molecules have been omitted.

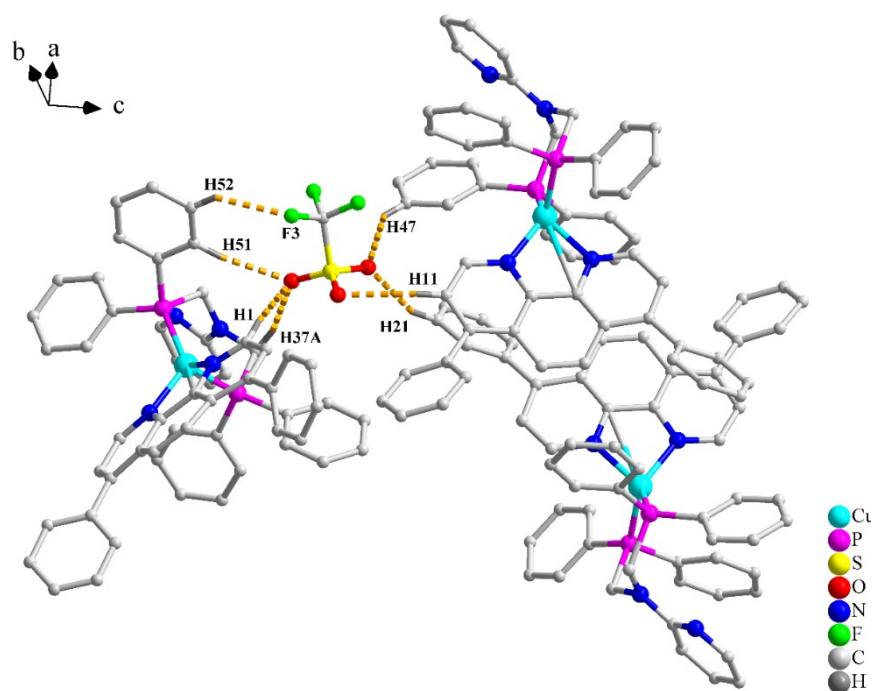

**Fig. S23** Hydrogen bonds in **1** (C1-H1...O2, 2.49 Å; C11-H11...O1, 2.50 Å; C21-H21...O3, 2.34 Å; C37-H37A...O2, 2.47 Å; C47-H47...O3, 2.48 Å; C51-H51...O2, 2.44 Å; C52-H52...F3, 2.46 Å).

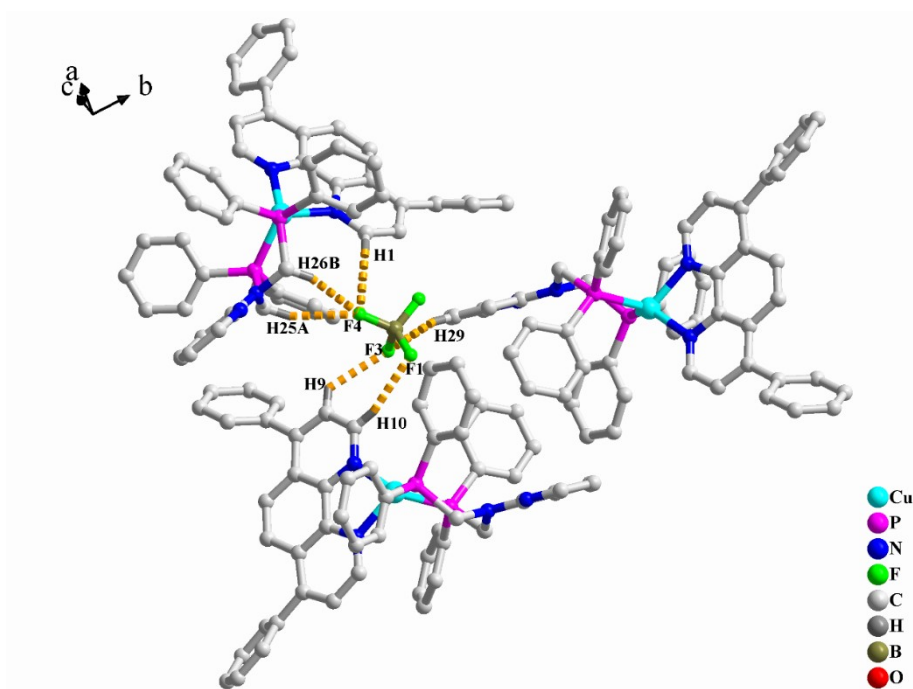

**Fig. S24** Hydrogen bonds in **2** (C1-H1...F4, 2.55 Å; C9-H9...F3, 2.46 Å; C10-H10...F1, 2.41 Å; C25-H25A...F4, 2.50 Å; C26-H26B...F4, 2.37 Å; C29-H29...F3, 2.39 Å).

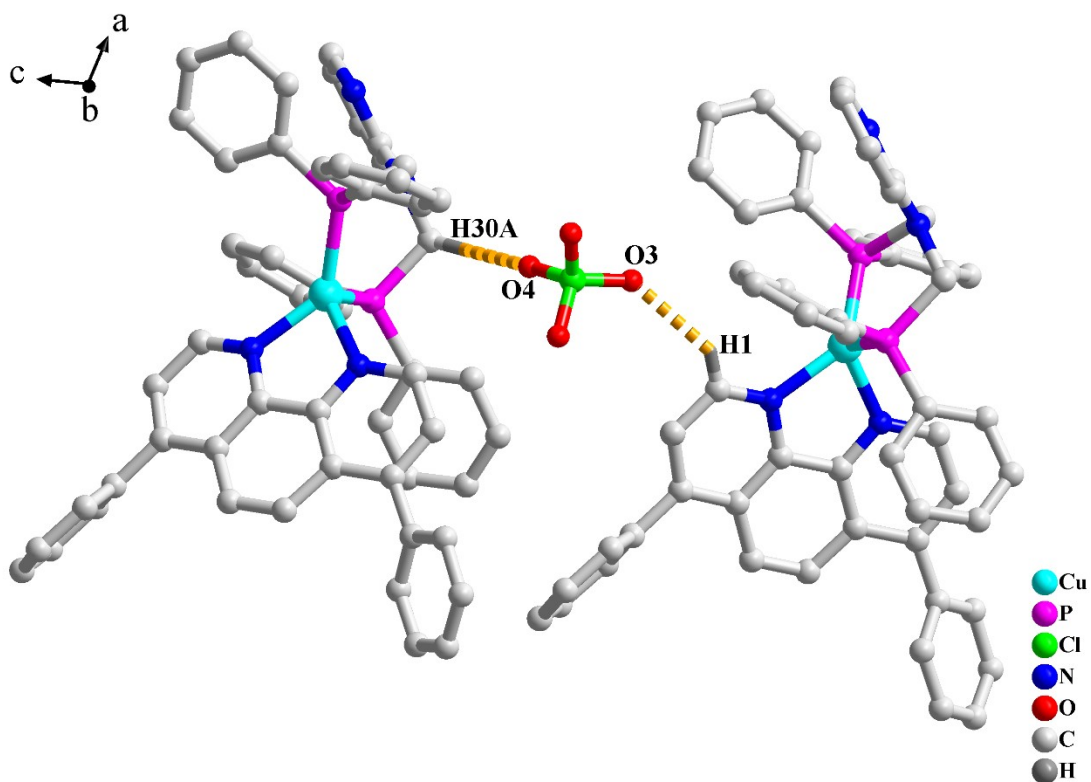

**Fig. S25** Hydrogen bonds in **3** (C1-H1...O3, 2.36 Å; C30-H30A...O4, 2.44 Å).

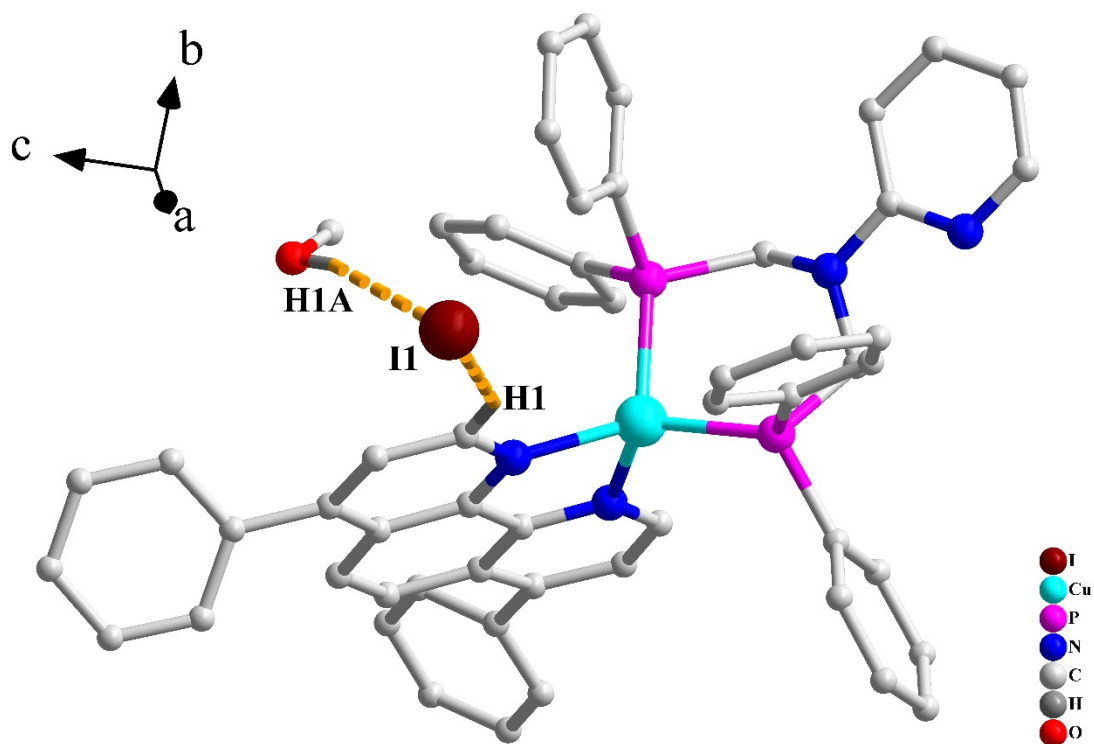

Fig. S26 Hydrogen bonds in **4** (O1-H1A...I1, 2.82 Å; C1-H1...I1, 3.06 Å).

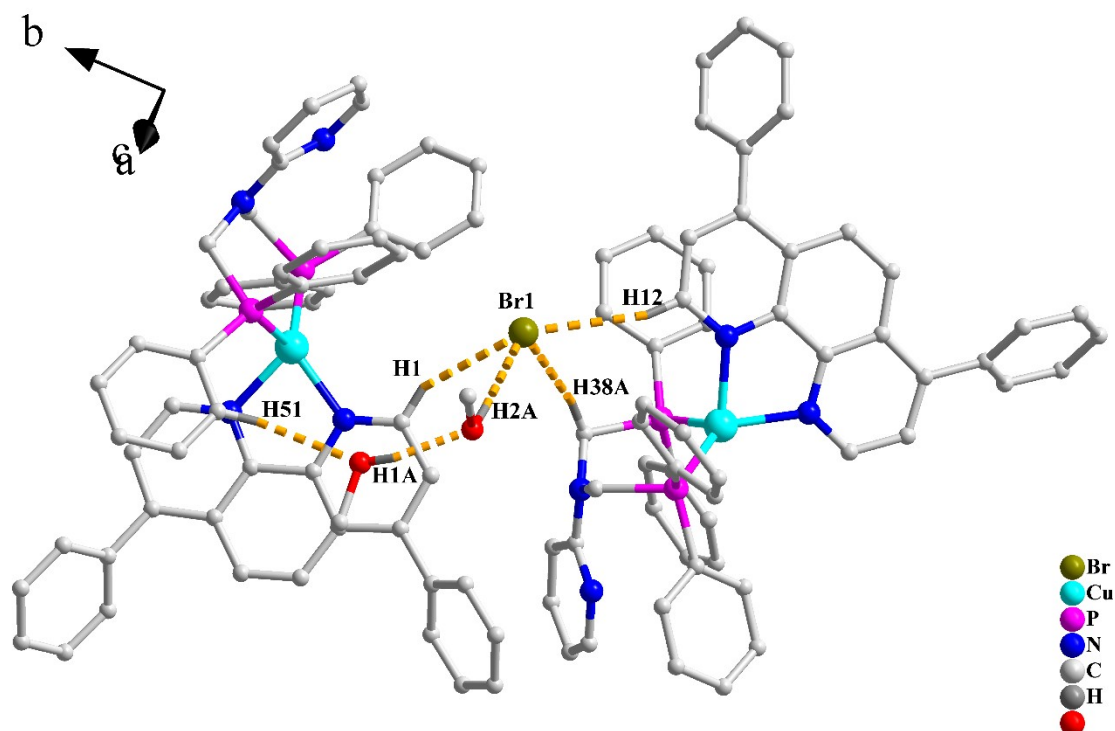

Fig. S27 Hydrogen bonds in **5** (O1-H1A...O2, 1.90 Å; O2-H2A...Br1, 2.48 Å; C1-H1...Br1, 2.86 Å; C12-H12...Br1, 2.85 Å; C38-H38A...Br1, 2.86 Å; C51-H51...O1, 2.56 Å).



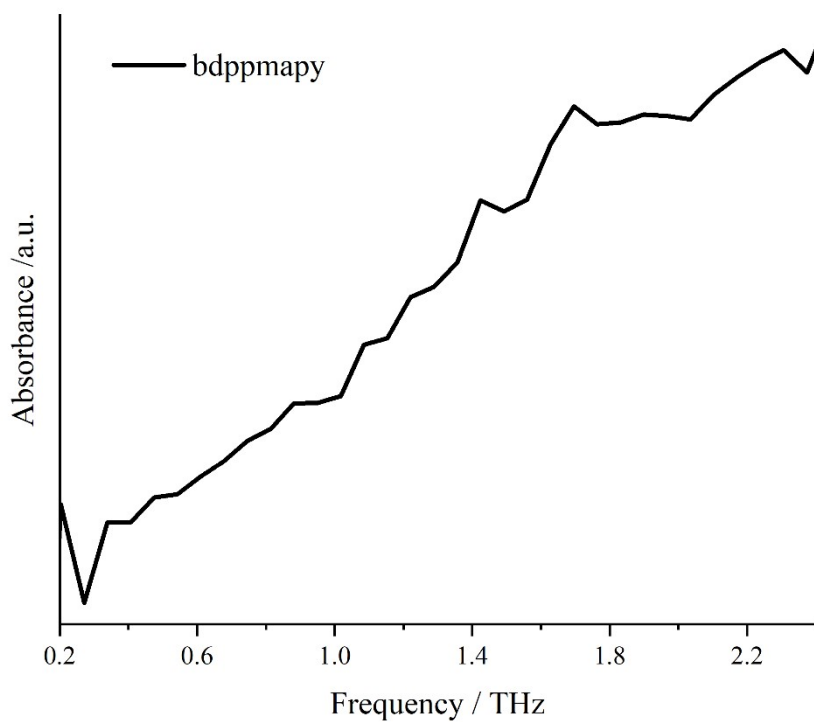

**Fig. S28** Terahertz time-domain spectroscopy (THz-TDS) of bdpmpapy.

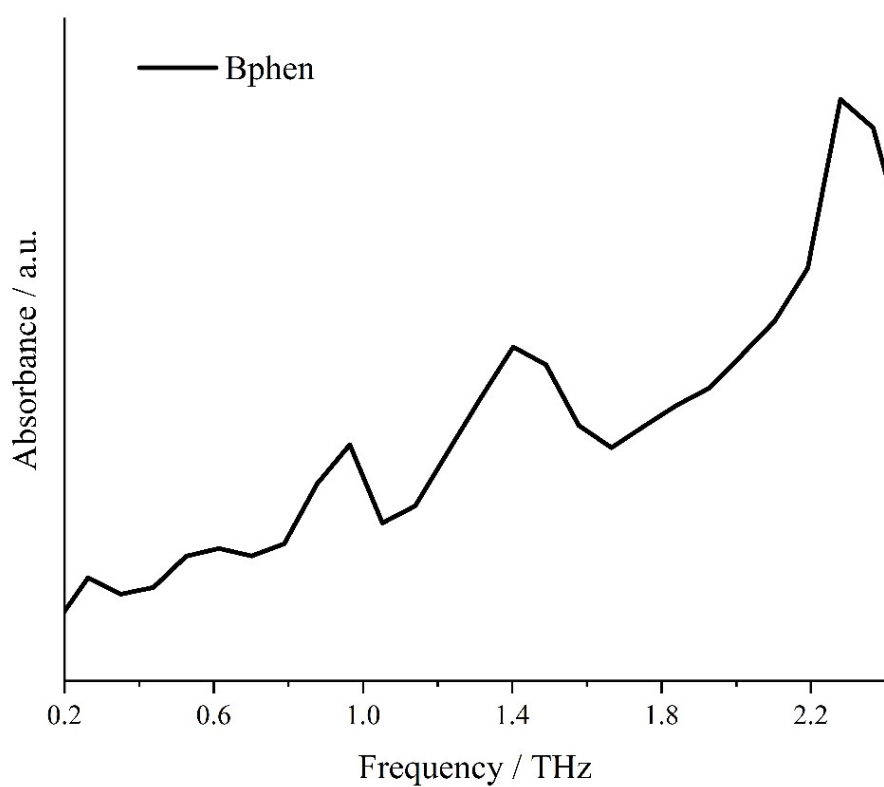

**Fig. S29** Terahertz time-domain spectroscopy (THz-TDS) of Bphen.

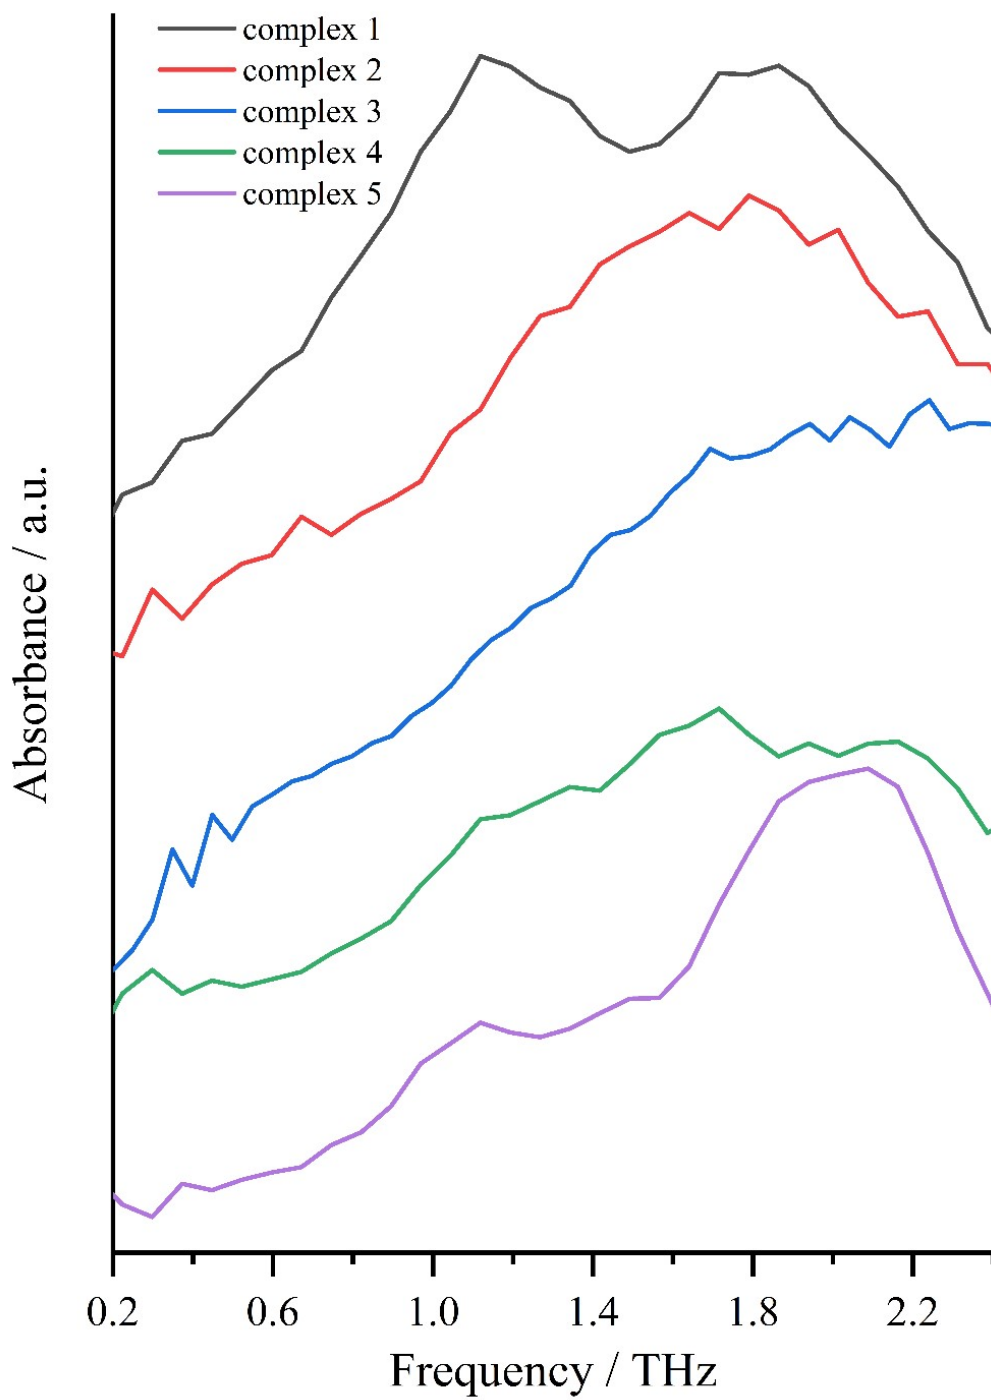

**Fig. S30** Terahertz time-domain spectroscopy (THz-TDS) of complexes 1-5.

**Table. S1** Selected bond lengths (Å) and angles (°) for complexes **1-5**.

| <b>Complex 1</b> |            |                 |             |
|------------------|------------|-----------------|-------------|
| Cu(1)-I(1)       | 2.6814(7)  | N(1)-Cu(1)-I(1) | 80.80(7)    |
| Cu(1)-N(1)       | 2.0700(33) | N(1)-Cu(1)-P(1) | 124.22(5)   |
| Cu(1)-P(1)       | 2.2838(11) | N(1)-Cu(1)-P(2) | 105.46(5)   |
| Cu(1)-P(2)       | 2.2912(9)  | I(1)-Cu(1)-P(1) | 127.14(5)   |
|                  |            | I(1)-Cu(1)-P(2) | 111.74(5)   |
|                  |            | P(1)-Cu(1)-P(2) | 104.99(2)   |
| <b>Complex 2</b> |            |                 |             |
| Cu(1)-N(1)       | 2.0647(18) | N(1)-Cu(1)-N(2) | 80.745(66)  |
| Cu(1)-N(2)       | 2.0574(17) | N(1)-Cu(1)-P(1) | 108.245(53) |
| Cu(1)-P(1)       | 2.2580(7)  | N(1)-Cu(1)-P(2) | 116.361(49) |
| Cu(1)-P(2)       | 2.2244(6)  | N(2)-Cu(1)-P(1) | 116.290(53) |
|                  |            | N(2)-Cu(1)-P(2) | 132.189(15) |
|                  |            | P(1)-Cu(1)-P(2) | 100.759(24) |
| <b>Complex 3</b> |            |                 |             |
| Cu(1)-N(1)       | 2.048(3)   | N(1)-Cu(1)-N(2) | 80.78(10)   |
| Cu(1)-N(2)       | 2.051(3)   | N(1)-Cu(1)-P(1) | 108.21(7)   |
| Cu(1)-P(1)       | 2.2503(9)  | N(1)-Cu(1)-P(2) | 132.19(8)   |
| Cu(1)-P(2)       | 2.2196(9)  | N(2)-Cu(1)-P(1) | 104.83(7)   |
|                  |            | N(2)-Cu(1)-P(2) | 121.45(8)   |
|                  |            | P(1)-Cu(1)-P(2) | 105.59(3)   |
| <b>Complex 4</b> |            |                 |             |
| Cu(1)-N(1)       | 2.055(2)   | N(1)-Cu(1)-N(2) | 80.88(9)    |
| Cu(1)-N(2)       | 2.047(2)   | N(1)-Cu(1)-P(1) | 118.14(7)   |
| Cu(1)-P(1)       | 2.2525(8)  | N(1)-Cu(1)-P(2) | 105.78(7)   |
| Cu(1)-P(2)       | 2.2109(8)  | N(2)-Cu(1)-P(1) | 135.23(7)   |
|                  |            | N(2)-Cu(1)-P(2) | 112.78(7)   |
|                  |            | P(1)-Cu(1)-P(2) | 100.86(3)   |
| <b>Complex 5</b> |            |                 |             |
| Cu(1)-N(1)       | 2.066(5)   | N(1)-Cu(1)-N(2) | 80.84(19)   |
| Cu(1)-N(2)       | 2.033(5)   | N(1)-Cu(1)-P(1) | 99.03(13)   |
| Cu(1)-P(1)       | 2.2575(15) | N(1)-Cu(1)-P(2) | 121.12(14)  |
| Cu(1)-P(2)       | 2.2061(15) | N(2)-Cu(1)-P(1) | 116.48(14)  |
|                  |            | N(2)-Cu(1)-P(2) | 129.55(14)  |
|                  |            | P(1)-Cu(1)-P(2) | 104.78(6)   |

**Table. S2** Intermolecular C-H... $\pi$  interactions for complex **1**.

| C-H...Cg( <i>i</i> )       | H...Cg distance / Å | C-H...Cg angel/(°) | C...Cg distance / Å |
|----------------------------|---------------------|--------------------|---------------------|
| C20-H20→Cg(3) <sup>i</sup> | 2.91                | 116                | 3.414               |

Cg(3)=N1-C6-C7-C10-C11-C12

Symmetric codes: <sup>i</sup> 0.5-x, 2-y, 1-z**Table. S3** Intermolecular C-H... $\pi$  interactions for complex **2**.

| C-H...Cg( <i>i</i> )          | H...Cg distance / Å | C-H...Cg angel/(°) | C...Cg distance / Å |
|-------------------------------|---------------------|--------------------|---------------------|
| C14-H14→Cg(4) <sup>i</sup>    | 2.84                | 117                | 3.37                |
| C36-H36→Cg(12) <sup>ii</sup>  | 2.92                | 136                | 3.65                |
| C56-H56C→Cg(4) <sup>iii</sup> | 2.41                | 166                | 3.35                |

Cg(4)=N2-C6-C7-C8-C9-C10

Cg(12)=C50-C51-C52-C53-C54-C55

Symmetric codes: <sup>i</sup> 2-x, -y, 2-z; <sup>ii</sup> -0.5+x, 0.5-y, 0.5+z; <sup>iii</sup> x, y, z**Table. S4** Intermolecular C-H... $\pi$  interactions for complex **3**.

| C-H...Cg( <i>i</i> )         | H...Cg distance / Å | C-H...Cg angel/(°) | C...Cg distance / Å |
|------------------------------|---------------------|--------------------|---------------------|
| C17-H17→Cg(8) <sup>i</sup>   | 2.86                | 127                | 3.50                |
| C18-H18→Cg(9) <sup>ii</sup>  | 2.85                | 171                | 3.77                |
| C20-H20→Cg(3) <sup>iii</sup> | 2.77                | 118                | 3.30                |
| C33-H33→Cg(10) <sup>ii</sup> | 2.86                | 148                | 3.69                |

Cg(3) = N1-C1-C2-C3-C4-C5

Cg(8) = C19-C20-C21-C22-C23-C24

Cg(9) = C31-C32-C33-C34-C35-C36

Cg(10)=C37-C38-C39-C40-C41-C41

Symmetric codes: <sup>i</sup> x, 0.5-y, 0.5+z; <sup>ii</sup> 1-x, 1-y, -z; <sup>iii</sup> 1-x, -y, -z**Table. S5** Intermolecular C-H... $\pi$  interactions for complex **4**.

| C-H...Cg( <i>i</i> )         | H...Cg distance / Å | C-H...Cg angel/(°) | C...Cg distance / Å |
|------------------------------|---------------------|--------------------|---------------------|
| C8-H8→Cg(12) <sup>i</sup>    | 2.94                | 138                | 3.688               |
| C20-H20→Cg(3) <sup>i</sup>   | 2.71                | 137                | 3.455               |
| C33-H33→Cg(12) <sup>ii</sup> | 2.89                | 133                | 3.584               |

Cg(3) = N1-C1-C2-C3-C4-C5

Cg(12) = C50-C51-C52-C53-C54-C55

Symmetric codes: <sup>i</sup> 1-x, 1-y, 1-z; <sup>ii</sup> -0.5+x, 1.5-y, 0.5+z**Table. S6** Intermolecular C-H... $\pi$  interactions for complex **5**.

| C-H...Cg( <i>i</i> )         | H...Cg distance / Å | C-H...Cg angel/(°) | C...Cg distance / Å |
|------------------------------|---------------------|--------------------|---------------------|
| C23-H23→Cg(12) <sup>i</sup>  | 2.97                | 153                | 3.823               |
| C28-H28→Cg(7) <sup>ii</sup>  | 2.76                | 149                | 3.584               |
| C40-H40→Cg(7) <sup>iii</sup> | 3.00                | 154                | 3.854               |
| C52-H52→Cg(9) <sup>iv</sup>  | 2.91                | 141                | 3.682               |

Cg(7) = C13-C14-C15-C16-C17-C18

Cg(9) = C25-C26-C27-C28-C29-C30

Cg(12) = C50-C51-C52-C53-C54-C55

Symmetric codes: <sup>i</sup> 0.5-x, -0.5+y, 1.5-z; <sup>ii</sup> 1+x, y, z; <sup>iii</sup> 0.5+x, 1.5-y, 0.5+z; <sup>iv</sup> -1+x, y, z

**Table. S7** Intermolecular  $\pi \dots \pi$  interactions for complex **2**.

| Cg...Cg( <i>i</i> )          | Cg...Cg distance / Å | Alpha |
|------------------------------|----------------------|-------|
| Cg(10)...Cg(10) <sup>i</sup> | 3.89                 | 0     |

Cg(10) = C38-C39-C40-C41-C42-C43

Symmetric codes: <sup>i</sup> 2-x, 1-y, 2-z

**Table. S8** Intermolecular  $\pi \dots \pi$  interactions for complex **3**.

| Cg...Cg( <i>i</i> )        | Cg...Cg distance / Å | Alpha |
|----------------------------|----------------------|-------|
| Cg(5)...Cg(5) <sup>i</sup> | 3.81                 | 0     |

Cg(5) = N4-C25-C26-C27-C28-C29

Symmetric codes: <sup>i</sup> 2-x, 1-y, -z

**Table. S9** Fluorescence data for ligands Bphen and bdppmapy.

| ligands  | $\lambda_{\text{ex}}$ / nm | $\lambda_{\text{em}}$ / nm |
|----------|----------------------------|----------------------------|
| Bphen    | 365                        | 405                        |
| bdppmapy | 380                        | 433                        |

**Table. S10** Energy, oscillator strength and major contribution of the calculated transitions for complex **3**.

| Excited state  | Energy              | Oscillator strength | Contribution %       |              |
|----------------|---------------------|---------------------|----------------------|--------------|
| 3 absorption   | 2.6213 eV 472.98 nm | 0.1760              | HOMO-2→LUMO          | 3.62         |
|                |                     |                     | <b>HOMO→LUMO</b>     | <b>92.89</b> |
| 3 absorption   | 3.9137 eV 316.80 nm | 0.2378              | HOMO-12→LUMO+1       | 2.17         |
|                |                     |                     | <b>HOMO-5→LUMO+1</b> | <b>67.30</b> |
|                |                     |                     | HOMO-4→LUMO          | 13.92        |
|                |                     |                     | HOMO→LUMO+3          | 3.20         |
| 3 absorption   | 4.7432 eV 261.39 nm | 0.1500              | HOMO-20→LUMO         | 6.63         |
|                |                     |                     | HOMO-19→LUMO+1       | 3.24         |
|                |                     |                     | HOMO-18→LUMO+1       | 3.83         |
|                |                     |                     | HOMO-5→LUMO+2        | 5.00         |
|                |                     |                     | HOMO-4→LUMO+5        | 3.15         |
|                |                     |                     | HOMO-3→LUMO+3        | 8.78         |
|                |                     |                     | HOMO-2→LUMO+4        | 3.29         |
|                |                     |                     | HOMO-2→LUMO+5        | 8.50         |
|                |                     |                     | <b>HOMO-2→LUMO+6</b> | <b>31.29</b> |
| HOMO-1→LUMO+10 | 2.60                |                     |                      |              |
| 3 emission     | 2.7022 eV 458.83 nm | 0.1496              | <b>LUMO→HOMO-2</b>   | <b>87.16</b> |
